# Supplementary material for: Tolerability of High Doses of Daptomycin in the Treatment of Prosthetic Vascular Graft Infection: A Retrospective Study
Source: PubMed Central journal article supplement — Infect Dis Ther. 2014 Sep 4;3(2):215–23. doi: 10.1007/s40121-014-0035-9 (PMC4269615; doi:10.1007/s40121-014-0035-9), 2014-09-04
Supplement: 40121_2014_35_MOESM1_ESM.pdf [file 40121_2014_35_MOESM1_ESM.pdf]

- Prosthetic vascular graft infection (PVGI) is a severe complication of vascular surgery that carries high morbidity and mortality rates.
- Here, we report the experience of a referral center for the management of PVGI, especially during the crucial post-operative period with high doses of daptomycin (DAP).
- Our findings indicate that high doses of DAP are well tolerated in patients with a severe condition and with moderate or severe renal impairment.
- We can conclude that DAP is a good alternative to vancomycin.
- It's the first report in the literature concerning these patients.

This summary slide represents the opinions of the authors. No funding or sponsorship was received for this study or publication of this article. We thank Jerri Bram for her English language assistance. For a full list of acknowledgments and conflicts of interest for all authors of this article, please see the full text online. Copyright © The Author(s) 2014. Creative Commons Attribution Noncommercial License (CC BY-NC).
